# Supplementary material
Source: PubMed Central journal article supplement (PMC3619348)
Supplement: 1302935110_pnas.201302935SI.pdf [file 1302935110_pnas.201302935SI.pdf]

# Supporting Information

Valkenburg et al. 10.1073/pnas.1302935110

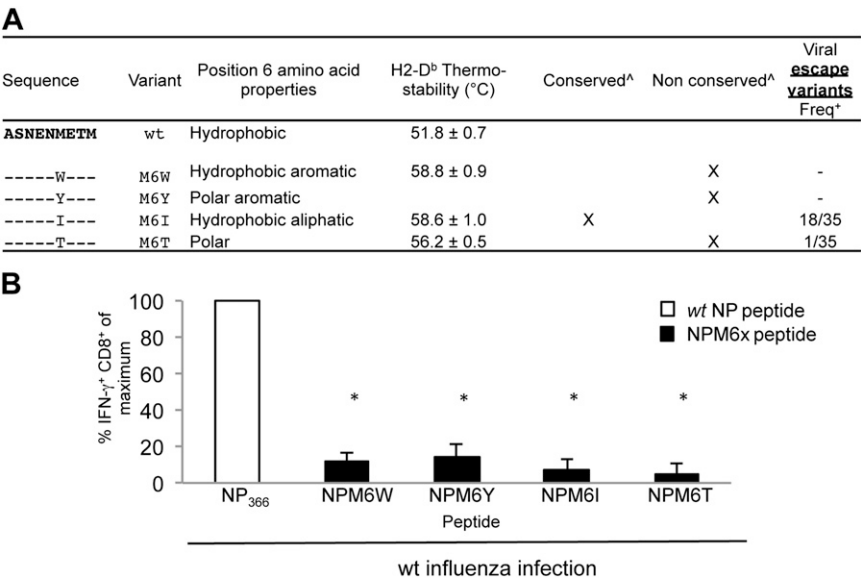

**Fig. S1.** The wt D<sup>b</sup>NP-specific CD8<sup>+</sup> T cells show little cross-reactivity with the substituted NPM6X peptides. (A) Various amino acid substitutions at PM6 for the NP<sub>366</sub> peptide caused biochemical changes that in no way diminished the thermostability of NPM6X binding to H-2D<sup>b</sup>. Temperatures (°C) represent the point where 50% of the peptide-MHC was unfolded. Amino acid substitutions were either conserved or nonconserved. The NPM6I and NPM6T escape variants were previously isolated from the lungs of infected mice (1). (B) Spleen cytotoxic T lymphocytes (CTLs) from mice primed intraperitoneally with the wt PR8 virus, then challenged intranasally with the wt HK virus 6 wk later, were analyzed for CD8<sup>+</sup> T-cell specificity on day 8 after secondary infection. Cells were stimulated directly ex vivo for 5 h (in the presence of Brefeldin A) with either the wt NP<sub>366</sub> or a panel of NPM6X peptides. IFN-γ production was measured by intracellular cytokine staining (ICS), and the background fluorescence was subtracted for the “no peptide” controls. Data represent mean ± SD (n = 5). Experiments were repeated at least twice. \*P ≤ 0.01 relative to wt HK NP<sub>366</sub>-specific response.

1. Wu TD, Brutlag DL (1996) Discovering empirically conserved amino acid substitution groups in databases of protein families. *Proc Int Conf Intell Syst Mol Biol* 4:230–240.  
2. French S, Robson B (1983) What is a conservative substitution? *J Mol Evol* 19:171–175.  
3. Price GE, Ou R, Jiang H, Huang L, Moskophidis D (2000) Viral escape by selection of cytotoxic T cell-resistant variants in influenza A virus pneumonia. *J Exp Med* 191(11):1853–1867.

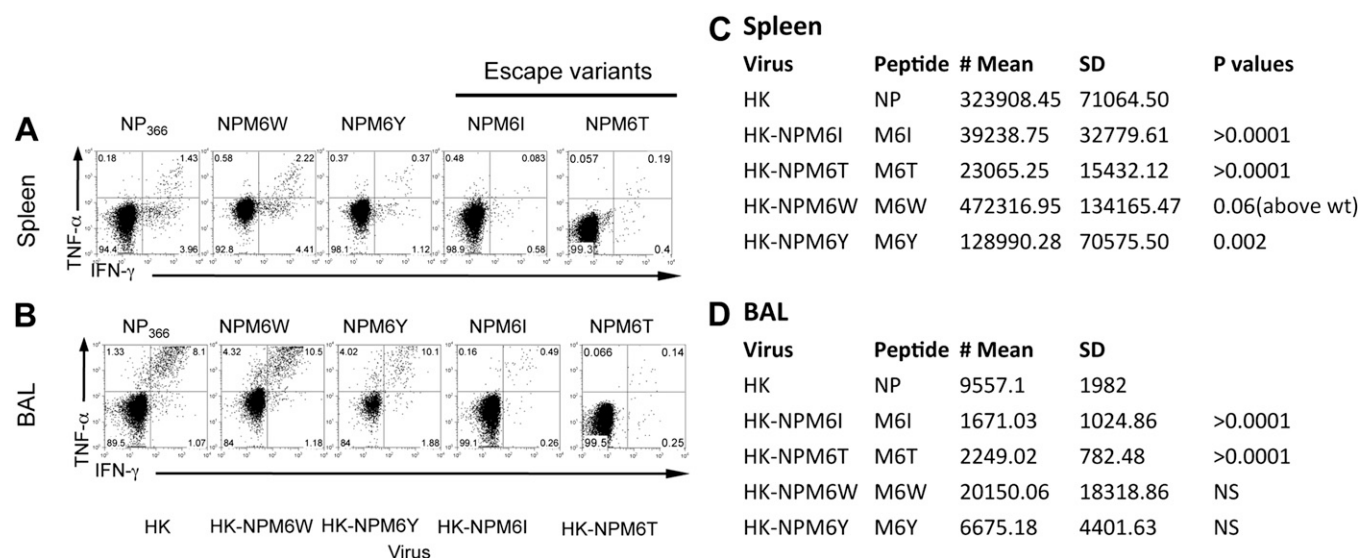

**Fig. S2.** The NPM6I and NPM6T escape variants generate minimal CD8<sup>+</sup> T-cell responses. Following intranasal infection with either the WT HK or mutant HK-NPM6X virus, (A and C) splenocytes or (B and D) BAL cells (from the site of infection) were stimulated with the WT NP or NPM6X peptides corresponding to the infecting virus. (A and B) Representative FACS plots are shown. (C and D) Numbers of epitope-specific CD8<sup>+</sup> T cells in (C) spleen and (D) BAL are presented as mean  $\pm$  SD. Background "no peptide" values were subtracted. Experiments were repeated at least twice. P values are shown for the comparison between the WT D<sup>b</sup>NP<sub>366</sub> CD8<sup>+</sup> T-cell responses and NPM6X<sup>+</sup>CD8<sup>+</sup> populations.

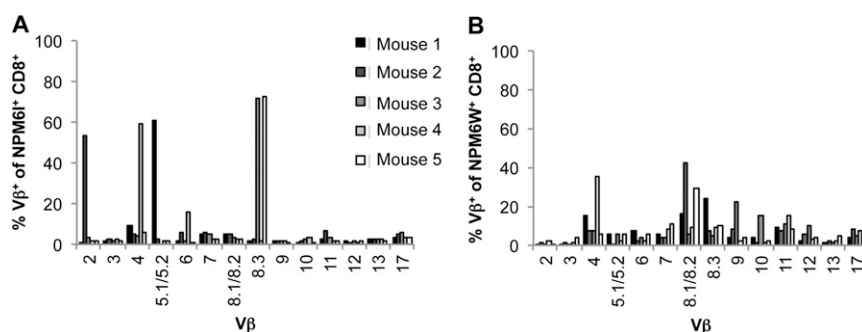

**Fig. S3.** Limited T-cell receptor (TCR) V $\beta$  use for the low precursor frequency NPM6I<sup>+</sup> CD8<sup>+</sup> T cells. Splenocytes were stained with D<sup>b</sup>NPM6X-allophycocyanin tetramer and a panel of 14 FITC mAb specific for the TCR V $\beta$  region. V $\beta$  use was assessed for secondary acute responses generated by homologous priming with PR8-NPM6I followed by infection with (A) HK-NPM6I or (B) HK-NPM6W. Data represent individual responses (n = 4–5 mice).



**Table S2.** Frequency of TCR $\beta$  clonotypes in D<sup>b</sup>NPM6I+V $\beta$ 8.3<sup>+</sup>CD8<sup>+</sup> cells and D<sup>b</sup>NPM6W<sup>+</sup> CD8<sup>+</sup> T cells within multiple V $\beta$ , after infection with HK-NPM6I or HK-NPM6W viruses

| CDR3β                | Jβ  | Amino acid length | Frequency, % |     |     |    |    |
|----------------------|-----|-------------------|--------------|-----|-----|----|----|
|                      |     |                   | M1           | M2  | M3  | M4 | M5 |
| D <sup>b</sup> NPM6I |     |                   |              |     |     |    |    |
| Vβ8.3                |     |                   |              |     |     |    |    |
| SDWRGEQ              | 2.6 | 7                 | 95           |     |     |    |    |
| SDARGFLAEQ           | 2.1 | 10                | 5            |     |     |    |    |
| SDWGTGGKAEQ          | 2.1 | 11                |              | 100 |     |    |    |
| Vβ1                  |     |                   |              |     |     |    |    |
| SQDLGGIYEQ           | 2.7 | 10                |              |     | 100 |    |    |
| Vβ4                  |     |                   |              |     |     |    |    |
| SQEAGGYEQ            | 2.7 | 9                 |              |     |     |    | 93 |
| SQDRTGGRDEQ          | 2.7 | 11                |              |     |     |    | 3  |
| SQDEFANTEV           | 1.1 | 10                |              |     |     |    | 3  |
| Total sequences      |     |                   | 40           | 35  | 32  | 30 |    |
| D <sup>b</sup> NPM6W |     |                   |              |     |     |    |    |
| Vβ4                  |     |                   |              |     |     |    |    |
| SQYWGGANEQ           | 2.1 | 10                |              |     |     |    | 15 |
| SQDRGLEQ             | 2.6 | 8                 |              |     |     |    | 27 |
| SQDRRNSYNSPL         | 1.6 | 12                |              |     |     |    | 29 |
| SQEGTGYSGNTL         | 1.3 | 12                |              |     |     |    | 27 |
| SQYWGGYAEQ           | 2.1 | 9                 |              |     |     |    | 2  |
| Vβ8.1                |     |                   |              |     |     |    |    |
| GAGLGGRAETL          | 2.3 | 11                |              | 6   |     |    |    |
| GDARTGVAETL          | 2.3 | 11                |              |     |     |    | 6  |
| GDASLYAEQ            | 2.1 | 9                 |              | 3   |     |    |    |
| GDHRGGIYAEQ          | 2.1 | 11                |              |     |     |    | 3  |
| GDRDDNYAEQ           | 2.1 | 10                |              | 6   |     |    |    |
| GDTGRYAEQ            | 2.1 | 9                 |              | 6   |     |    |    |
| GEPGLGPYEQ           | 2.6 | 10                |              |     |     |    | 6  |
| GGGTFVYEQ            | 2.6 | 9                 |              | 10  |     |    |    |
| GGLGGNYAEQ           | 2.1 | 10                |              |     |     |    | 54 |
| GVGSNYAEQ            | 2.1 | 9                 |              | 26  |     |    |    |
| GVRQSSGNTL           | 1.3 | 10                |              |     |     |    | 20 |
| Vβ8.2                |     |                   |              |     |     |    |    |
| SDSWGGAEQ            | 2.6 | 9                 |              |     |     |    |    |
| SEHRGRTEV            | 1.1 | 9                 |              | 26  |     |    |    |
| SPGRGGAE             | 2.1 | 9                 |              | 6   |     |    |    |
| SPGRGGAEQ            | 2.1 | 9                 |              | 10  |     |    |    |
| Vβ8.3                |     |                   |              |     |     |    |    |
| SDGTGAQDTQ           | 2.5 | 10                | 89           |     |     |    |    |
| SDGTGAKTPSTLGQ       |     | 15                | 3            |     |     |    |    |
| SDGTGAQDTSTLGQ       |     | 15                | 3            |     |     |    |    |
| SDRDRVYAEQ           | 2.1 | 10                | 3            |     |     |    |    |
| SENGVEQ              | 2.6 | 7                 | 3            |     |     |    |    |
| Vβ9                  |     |                   |              |     |     |    |    |
| SRIRGGRDTQ           | 2.5 | 10                |              |     | 18  |    |    |
| SRDRAEQ              | 2.6 | 7                 |              |     | 32  |    |    |
| SHRGLNQAP            | 1.5 | 9                 |              |     | 47  |    |    |
| RHRGANTEV            | 1.1 | 9                 |              |     | 3   |    |    |
| Total sequences      |     |                   | 38           | 31  | 34  | 41 | 35 |

| Summary                           | D <sup>b</sup> NP <sub>366</sub> <sup>Δ*</sup> | D <sup>b</sup> NPM6I | D <sup>b</sup> NPM6W         |
|-----------------------------------|------------------------------------------------|----------------------|------------------------------|
| Mice analyzed                     | 10                                             | 4                    | 4                            |
| TCRs sequenced                    | 976                                            | 137                  | 179                          |
| Vβ population sequenced           | 8.3                                            | 8.3, 1, 4            | 4, 8.1/8.2, 8.3, 9           |
| Predominant Jβ region             | 2.2, 1.1                                       | 2.6, 2.1, 2.7        | 1.1, 1.3, 1.5, 2.1, 2.5, 2.6 |
| Predominant CDR3β length          | 9                                              | 7–11                 | 7–12                         |
| Repeated (shared) sequence        | 3                                              | None                 | None                         |
| Clonotypes per mouse (amino acid) | 7.9 ± 2.5                                      | 1.75 ± 0.95          | 5.75 ± 2.2                   |
| Simpson's Diversity Index         | 0.52 ± 0.2                                     | 0.06 ± 0.07*         | 0.63 ± 0.25                  |

^\*Analysis from Turner et al. (1). D<sup>b</sup>NPM6I<sup>+</sup>CD8<sup>+</sup> TCR $\beta$  repertoire was analyzed following the 2<sup>o</sup> challenge with mutant HK-NPM6I virus; D<sup>b</sup>NPM6W<sup>+</sup>CD8<sup>+</sup> TCR $\beta$  repertoire was analyzed following 1<sup>o</sup> infection with HK-NPM6W virus. M, an individual mouse. \**P* > 0.01 relative to wt.

1. Turner SJ, et al. (2005) Lack of prominent peptide-major histocompatibility complex features limits repertoire diversity in virus-specific CD8+ T cell populations. *Nat Immunol* 6(4): 382–389.
